# Supplementary material for: Comparison of Four Complete Chloroplast Genomes of Medicinal and Ornamental Meconopsis Species: Genome Organization and Species Discrimination
Source: PubMed Central journal article supplement (PMC6646306; doi:10.1038/s41598-019-47008-8), 2019-07-22

## Supplementary

Title: Comparison of Four Complete Chloroplast Genomes of Medicinal and Ornamental *Meconopsis* Species: Genome Organization and Species Discrimination

**Xiaoxue Li <sup>1+</sup>, Wei Tan<sup>2+</sup>, Jiqi Sun<sup>1</sup>, Junhua Du<sup>3</sup>, Chenguang Zheng<sup>1</sup>, Xiaoxuan Tian<sup>2</sup>, Min Zheng<sup>1</sup>, Beibei Xiang <sup>4,\*</sup>, and Yong Wang<sup>1,\*</sup>**

<sup>1</sup> College of Life Science, Nankai University, Weijin road 94, 300071 Tianjin, China

<sup>2</sup> Tianjin State Key Laboratory of Modern Chinese Medicine, Tianjin University of Traditional Chinese Medicine, Poyang lake road 10, 301617, Tianjin, China

<sup>3</sup> College of Life and Geographic Sciences, Qinghai Normal University, 36 wusixi Street, 810008, Qinghai, China

<sup>4</sup>School of Chinese Materia Medica, Tianjin University of Traditional Chinese Medicine, Poyang lake road 10, 301617, Tianjin, China

\*Corresponding: xiangbeibei03230@163.com(B.X.);

wangyong@nankai.edu.cn(Y.W.)

<sup>+</sup>These authors contributed equally to this work

Supplementary Table 1. Primers of the *Meconopsis integrifolia* (Maxim.) Franch to validated the gaps.

| Species                                        | Forward sequence          | Reverse sequence       | Length (bp) |
|------------------------------------------------|---------------------------|------------------------|-------------|
| <i>Meconopsis integrifolia</i> (Maxim.) Franch | TCCATGAGATTCATAGTTGCATTAC | GTTTTTCAGGAATAGTGGCGTT | 390         |

Supplementary Table 2. The condon-anticodon recognition pattern and codon usage for the *Meconopsis racemosa* chloroplast genome.

| Codon | Amino Acid | No.  | RSCU | tRNA     | Codon | Amino Acid | No. | RSCU |
|-------|------------|------|------|----------|-------|------------|-----|------|
| UUU   | F          | 1004 | 1.22 |          | UUU   | F          | 7   | 0.64 |
| UUC   | F          | 643  | 0.78 | trnA-UGC | UUC   | F          | 15  | 1.36 |
| UUA   | L          | 681  | 1.63 |          | UUA   | L          | 4   | 0.37 |
| UUG   | L          | 523  | 1.25 | trnA-UGC | UUG   | L          | 15  | 1.38 |
| CUU   | L          | 500  | 1.19 |          | CUU   | L          | 16  | 1.48 |
| CUC   | L          | 245  | 0.59 | trnC-GCA | CUC   | L          | 12  | 1.11 |
| CUA   | L          | 350  | 0.84 | trnD-GUC | CUA   | L          | 8   | 0.74 |
| CUG   | L          | 212  | 0.51 |          | CUG   | L          | 10  | 0.92 |
| AUU   | I          | 933  | 1.36 | trnE-UUC | AUU   | I          | 10  | 1.03 |
| AUC   | I          | 527  | 0.77 |          | AUC   | I          | 12  | 1.24 |
| AUA   | I          | 597  | 0.87 | trnF-GAA | AUA   | I          | 7   | 0.72 |
| AUG   | M          | 547  | 1    | trnM-CAU | AUG   | M          | 9   | 1    |
| GUU   | V          | 489  | 1.39 |          | GUU   | V          | 17  | 1.17 |
| GUC   | V          | 230  | 0.65 | trnG-GCC | GUC   | V          | 11  | 0.76 |
| GUA   | V          | 472  | 1.34 |          | GUA   | V          | 16  | 1.1  |
| GUG   | V          | 216  | 0.61 | trnG-UCC | GUG   | V          | 14  | 0.97 |

|     |   |      |      |          |     |   |    |      |
|-----|---|------|------|----------|-----|---|----|------|
| CCU | P | 329  | 1.28 | trnH-GUG | CCU | P | 16 | 1.36 |
| CCC | P | 223  | 0.87 |          | CCC | P | 12 | 1.02 |
| CCA | P | 308  | 1.2  | trnI-CAU | CCA | P | 8  | 0.68 |
| CCG | P | 166  | 0.65 |          | CCG | P | 11 | 0.94 |
| ACU | T | 405  | 1.33 | trnI-CAU | ACU | T | 4  | 0.73 |
| ACC | T | 269  | 0.88 | trnI-GAU | ACC | T | 8  | 1.45 |
| ACA | T | 382  | 1.25 |          | ACA | T | 4  | 0.73 |
| ACG | T | 166  | 0.54 | trnI-GAU | ACG | T | 6  | 1.09 |
| GCU | A | 451  | 1.64 |          | GCU | A | 13 | 1.27 |
| GCC | A | 196  | 0.71 | trnK-UUU | GCC | A | 8  | 0.78 |
| GCA | A | 312  | 1.14 | trnL-CAA | GCA | A | 9  | 0.88 |
| GCG | A | 140  | 0.51 |          | GCG | A | 11 | 1.07 |
| UAU | Y | 795  | 1.44 | trnL-CAA | UAU | Y | 4  | 1.14 |
| UAC | Y | 306  | 0.56 | trnL-UAA | UAC | Y | 3  | 0.86 |
| CAU | H | 466  | 1.38 |          | CAU | H | 13 | 1.73 |
| CAC | H | 207  | 0.62 | trnL-UAG | CAC | H | 2  | 0.27 |
| CAA | Q | 659  | 1.44 |          | CAA | Q | 10 | 0.91 |
| CAG | Q | 258  | 0.56 | trnM-CAU | CAG | Q | 12 | 1.09 |
| AAU | N | 810  | 1.41 |          | AAU | N | 12 | 1.14 |
| AAC | N | 339  | 0.59 | trnN-GUU | AAC | N | 9  | 0.86 |
| AAA | K | 1009 | 1.4  | trnN-GUU | AAA | K | 10 | 1.33 |
| AAG | K | 428  | 0.6  |          | AAG | K | 5  | 0.67 |
| GAU | D | 664  | 1.49 | trnP-UGG | GAU | D | 13 | 1.37 |
| GAC | D | 227  | 0.51 |          | GAC | D | 6  | 0.63 |
| GAA | E | 844  | 1.42 | trnQ-UUG | GAA | E | 13 | 0.79 |

|     |      |     |      |          |     |      |    |      |
|-----|------|-----|------|----------|-----|------|----|------|
| GAG | E    | 343 | 0.58 | trnR-ACG | GAG | E    | 20 | 1.21 |
| UGU | C    | 282 | 1.23 |          | UGU | C    | 12 | 1.2  |
| UGC | C    | 175 | 0.77 | trnR-ACG | UGC | C    | 8  | 0.8  |
| UGG | W    | 484 | 1    |          | UGG | W    | 13 | 1    |
| CGU | R    | 249 | 0.89 | trnR-UCU | CGU | R    | 9  | 0.82 |
| CGC | R    | 107 | 0.38 | trnS-GCU | CGC | R    | 8  | 0.73 |
| CGA | R    | 335 | 1.19 |          | CGA | R    | 12 | 1.09 |
| CGG | R    | 149 | 0.53 | trnS-GGA | CGG | R    | 14 | 1.27 |
| AGA | R    | 571 | 2.03 |          | AGA | R    | 9  | 0.82 |
| AGG | R    | 277 | 0.98 | trnS-UGA | AGG | R    | 14 | 1.27 |
| GGU | G    | 468 | 1.15 |          | GGU | G    | 27 | 1.52 |
| GGC | G    | 201 | 0.5  | trnT-GGU | GGC | G    | 15 | 0.85 |
| GGA | G    | 583 | 1.44 | trnT-UGU | GGA | G    | 14 | 0.79 |
| GGG | G    | 371 | 0.91 |          | GGG | G    | 15 | 0.85 |
| UCU | S    | 574 | 1.57 | trnV-GAC | UCU | S    | 9  | 0.61 |
| UCC | S    | 340 | 0.93 |          | UCC | S    | 12 | 0.82 |
| UCA | S    | 477 | 1.31 | trnV-GAC | UCA | S    | 17 | 1.16 |
| UCG | S    | 240 | 0.66 | trnV-UAC | UCG | S    | 18 | 1.23 |
| AGU | S    | 355 | 0.97 |          | AGU | S    | 13 | 0.89 |
| AGC | S    | 203 | 0.56 | trnW-CCA | AGC | S    | 19 | 1.3  |
| UAA | STOP | 367 | 1.07 |          | UAA | STOP | 12 | 1.29 |
| UAG | STOP | 265 | 0.77 | trnY-GUA | UAG | STOP | 12 | 1.29 |
| UGA | STOP | 394 | 1.15 |          | UGA | STOP | 4  | 0.43 |

Supplementary Table 3. The condon-anticodon recognition pattern and codon usage for the *Meconopsis integrifolia*(Maxim.) Franch chloroplast

genome.

| Codon | Amino Acid | No. | RSCU | tRNA     | Codon | Amino Acid | No. | RSCU |
|-------|------------|-----|------|----------|-------|------------|-----|------|
| UUU   | F          | 938 | 1.25 |          | UUU   | F          | 7   | 0.61 |
| UUC   | F          | 565 | 0.75 | trnA-UGC | UUC   | F          | 16  | 1.39 |
| UUA   | L          | 822 | 1.69 | trnA-UGC | UUA   | L          | 3   | 0.29 |
| UUG   | L          | 587 | 1.21 |          | UUG   | L          | 13  | 1.26 |
| CUU   | L          | 586 | 1.2  | trnC-GCA | CUU   | L          | 14  | 1.35 |
| CUC   | L          | 256 | 0.53 |          | CUC   | L          | 16  | 1.55 |
| CUA   | L          | 407 | 0.84 | trnD-GUC | CUA   | L          | 7   | 0.68 |
| CUG   | L          | 260 | 0.53 | trnE-UUC | CUG   | L          | 9   | 0.87 |
| AUU   | I          | 979 | 1.36 |          | AUU   | I          | 13  | 1.22 |
| AUC   | I          | 449 | 0.62 | trnF-GAA | AUC   | I          | 11  | 1.03 |
| AUA   | I          | 738 | 1.02 |          | AUA   | I          | 8   | 0.75 |
| AUG   | M          | 646 | 1    | trnM-CAU | AUG   | M          | 7   | 1    |
| GUU   | V          | 523 | 1.38 |          | GUU   | V          | 14  | 1    |
| GUC   | V          | 216 | 0.57 | trnG-GCC | GUC   | V          | 11  | 0.79 |
| GUA   | V          | 538 | 1.42 | trnG-UCC | GUA   | V          | 17  | 1.21 |
| GUG   | V          | 240 | 0.63 |          | GUG   | V          | 14  | 1    |
| CCU   | P          | 394 | 1.42 | trnH-GUG | CCU   | P          | 16  | 1.39 |
| CCC   | P          | 207 | 0.75 |          | CCC   | P          | 11  | 0.96 |
| CCA   | P          | 333 | 1.2  | trnI-CAU | CCA   | P          | 9   | 0.78 |
| CCG   | P          | 175 | 0.63 | trnI-CAU | CCG   | P          | 10  | 0.87 |
| ACU   | T          | 449 | 1.4  |          | ACU   | T          | 5   | 1.05 |
| ACC   | T          | 239 | 0.75 | trnI-GAU | ACC   | T          | 7   | 1.47 |

|     |   |      |      |          |     |   |    |      |
|-----|---|------|------|----------|-----|---|----|------|
| ACA | T | 408  | 1.28 | trnI-GAU | ACA | T | 4  | 0.84 |
| ACG | T | 183  | 0.57 |          | ACG | T | 3  | 0.63 |
| GCU | A | 525  | 1.65 | trnK-UUU | GCU | A | 14 | 1.27 |
| GCC | A | 224  | 0.7  |          | GCC | A | 9  | 0.82 |
| GCA | A | 371  | 1.16 | trnL-CAA | GCA | A | 9  | 0.82 |
| GCG | A | 155  | 0.49 | trnL-CAA | GCG | A | 12 | 1.09 |
| UAU | Y | 769  | 1.58 |          | UAU | Y | 5  | 1.11 |
| UAC | Y | 207  | 0.42 | trnL-UAA | UAC | Y | 4  | 0.89 |
| CAU | H | 482  | 1.5  |          | CAU | H | 12 | 1.6  |
| CAC | H | 160  | 0.5  | trnL-UAG | CAC | H | 3  | 0.4  |
| CAA | Q | 664  | 1.46 |          | CAA | Q | 11 | 0.96 |
| CAG | Q | 245  | 0.54 | trnM-CAU | CAG | Q | 12 | 1.04 |
| AAU | N | 886  | 1.46 | trnN-GUU | AAU | N | 13 | 1.3  |
| AAC | N | 331  | 0.54 |          | AAC | N | 7  | 0.7  |
| AAA | K | 1058 | 1.41 | trnN-GUU | AAA | K | 10 | 1.33 |
| AAG | K | 447  | 0.59 |          | AAG | K | 5  | 0.67 |
| GAU | D | 787  | 1.54 | trnP-UGG | GAU | D | 11 | 1.47 |
| GAC | D | 238  | 0.46 |          | GAC | D | 4  | 0.53 |
| GAA | E | 928  | 1.41 | trnQ-UUG | GAA | E | 13 | 0.81 |
| GAG | E | 387  | 0.59 |          | GAG | E | 19 | 1.19 |
| UGU | C | 222  | 1.34 | trnR-ACG | UGU | C | 12 | 1.14 |
| UGC | C | 110  | 0.66 |          | UGC | C | 9  | 0.86 |
| UGG | W | 493  | 1    | trnR-UCU | UGG | W | 17 | 1    |
| CGU | R | 299  | 1.16 |          | CGU | R | 8  | 0.71 |
| CGC | R | 100  | 0.39 | trnS-GCU | CGC | R | 7  | 0.62 |

|     |      |     |      |          |     |      |    |      |
|-----|------|-----|------|----------|-----|------|----|------|
| CGA | R    | 317 | 1.23 | trnS-GGA | CGA | R    | 9  | 0.79 |
| CGG | R    | 142 | 0.55 |          | CGG | R    | 15 | 1.32 |
| AGA | R    | 490 | 1.9  | trnS-UGA | AGA | R    | 12 | 1.06 |
| AGG | R    | 202 | 0.78 |          | AGG | R    | 17 | 1.5  |
| GGU | G    | 506 | 1.22 | trnT-GGU | GGU | G    | 28 | 1.49 |
| GGC | G    | 167 | 0.4  | trnT-UGU | GGC | G    | 15 | 0.8  |
| GGA | G    | 652 | 1.57 |          | GGA | G    | 15 | 0.8  |
| GGG | G    | 338 | 0.81 | trnV-GAC | GGG | G    | 17 | 0.91 |
| UCU | S    | 519 | 1.53 | trnV-GAC | UCU | S    | 9  | 0.64 |
| UCC | S    | 371 | 1.1  |          | UCC | S    | 14 | 1    |
| UCA | S    | 442 | 1.31 | trnV-UAC | UCA | S    | 16 | 1.14 |
| UCG | S    | 208 | 0.61 |          | UCG | S    | 16 | 1.14 |
| AGU | S    | 348 | 1.03 | trnW-CCA | AGU | S    | 10 | 0.71 |
| AGC | S    | 144 | 0.43 | trnY-GUA | AGC | S    | 19 | 1.36 |
| UAA | STOP | 103 | 1.05 |          | UAA | STOP | 11 | 1.18 |
| UAG | STOP | 103 | 1.05 |          | UAG | STOP | 11 | 1.18 |
| UGA | STOP | 87  | 0.89 |          | UGA | STOP | 6  | 0.64 |

Supplementary Table 4. The codon-anticodon recognition pattern and codon usage for the *Meconopsis punice* chloroplast genome.

| Codon | Amino Acid | No. | RSCU | tRNA     | Codon | Amino Acid | No. | RSCU |
|-------|------------|-----|------|----------|-------|------------|-----|------|
| UUU   | F          | 944 | 1.28 | trnA-UGC | UUU   | F          | 8   | 0.59 |
| UUC   | F          | 532 | 0.72 |          | UUC   | F          | 19  | 1.41 |

|     |   |      |      |          |     |   |    |      |
|-----|---|------|------|----------|-----|---|----|------|
| UUA | L | 828  | 1.82 | trnA-UGC | UUA | L | 10 | 0.9  |
| UUG | L | 539  | 1.18 |          | UUG | L | 16 | 1.43 |
| CUU | L | 592  | 1.3  | trnC-GCA | CUU | L | 3  | 0.27 |
| CUC | L | 206  | 0.45 |          | CUC | L | 18 | 1.61 |
| CUA | L | 373  | 0.82 | trnD-GUC | CUA | L | 8  | 0.72 |
| CUG | L | 196  | 0.43 | trnE-UUC | CUG | L | 12 | 1.07 |
| AUU | I | 1048 | 1.43 |          | AUU | I | 11 | 1.06 |
| AUC | I | 428  | 0.58 | trnF-GAA | AUC | I | 13 | 1.26 |
| AUA | I | 724  | 0.99 | trnM-CAU | AUA | I | 7  | 0.68 |
| AUG | M | 632  | 1    |          | AUG | M | 9  | 1    |
| GUU | V | 528  | 1.45 | trnG-GCC | GUU | V | 18 | 1.31 |
| GUC | V | 201  | 0.55 |          | GUC | V | 15 | 1.09 |
| GUA | V | 514  | 1.42 | trnG-UCC | GUA | V | 12 | 0.87 |
| GUG | V | 210  | 0.58 | trnH-GUG | GUG | V | 10 | 0.73 |
| CCU | P | 427  | 1.53 |          | CCU | P | 12 | 1.12 |
| CCC | P | 216  | 0.77 | trnI-CAU | CCC | P | 12 | 1.12 |
| CCA | P | 321  | 1.15 |          | CCA | P | 6  | 0.56 |
| CCG | P | 155  | 0.55 | trnI-CAU | CCG | P | 13 | 1.21 |
| ACU | T | 504  | 1.5  |          | ACU | T | 8  | 1.33 |
| ACC | T | 258  | 0.77 | trnI-GAU | ACC | T | 5  | 0.83 |
| ACA | T | 418  | 1.24 |          | ACA | T | 3  | 0.5  |
| ACG | T | 166  | 0.49 | trnI-GAU | ACG | T | 8  | 1.33 |
| GCU | A | 595  | 1.74 | trnK-UUU | GCU | A | 11 | 0.92 |
| GCC | A | 238  | 0.7  |          | GCC | A | 11 | 0.92 |
| GCA | A | 385  | 1.13 | trnL-CAA | GCA | A | 12 | 1    |



|     |   |      |      |          |     |   |    |      |
|-----|---|------|------|----------|-----|---|----|------|
| GCG | A | 150  | 0.44 | trnL-CAA | GCG | A | 14 | 1.17 |
| UAU | Y | 784  | 1.61 |          | UAU | Y | 3  | 0.75 |
| UAC | Y | 187  | 0.39 | trnL-UAA | UAC | Y | 5  | 1.25 |
| CAU | H | 490  | 1.52 |          | CAU | H | 8  | 1.6  |
| CAC | H | 154  | 0.48 | trnL-UAG | CAC | H | 2  | 0.4  |
| CAA | Q | 691  | 1.52 | trnM-CAU | CAA | Q | 13 | 1.04 |
| CAG | Q | 221  | 0.48 |          | CAG | Q | 12 | 0.96 |
| AAU | N | 942  | 1.52 | trnN-GUU | AAU | N | 15 | 1.58 |
| AAC | N | 298  | 0.48 |          | AAC | N | 4  | 0.42 |
| AAA | K | 1079 | 1.47 | trnN-GUU | AAA | K | 12 | 1    |
| AAG | K | 390  | 0.53 | trnP-UGG | AAG | K | 12 | 1    |
| GAU | D | 847  | 1.54 |          | GAU | D | 8  | 1.23 |
| GAC | D | 253  | 0.46 | trnQ-UUG | GAC | D | 5  | 0.77 |
| GAA | E | 998  | 1.45 |          | GAA | E | 9  | 0.72 |
| GAG | E | 377  | 0.55 | trnR-ACG | GAG | E | 16 | 1.28 |
| UGU | C | 221  | 1.42 |          | UGU | C | 8  | 1.23 |
| UGC | C | 90   | 0.58 | trnR-ACG | UGC | C | 5  | 0.77 |
| UGG | W | 467  | 1    | trnR-UCU | UGG | W | 29 | 1    |
| CGU | R | 343  | 1.3  |          | CGU | R | 8  | 0.66 |
| CGC | R | 100  | 0.38 | trnS-GCU | CGC | R | 11 | 0.9  |
| CGA | R | 347  | 1.32 |          | CGA | R | 11 | 0.9  |
| CGG | R | 120  | 0.46 | trnS-GGA | CGG | R | 17 | 1.4  |
| AGA | R | 487  | 1.85 |          | AGA | R | 9  | 0.74 |
| AGG | R | 182  | 0.69 | trnS-UGA | AGG | R | 17 | 1.4  |
| GGU | G | 570  | 1.28 | trnT-GGU | GGU | G | 20 | 1.45 |

|     |      |     |      |          |     |      |    |      |
|-----|------|-----|------|----------|-----|------|----|------|
| GGC | G    | 181 | 0.4  | trnT-UGU | GGC | G    | 12 | 0.87 |
| GGA | G    | 704 | 1.57 |          | GGA | G    | 9  | 0.65 |
| GGG | G    | 333 | 0.74 | trnV-GAC | GGG | G    | 14 | 1.02 |
| UCU | S    | 558 | 1.62 |          | UCU | S    | 9  | 0.75 |
| UCC | S    | 354 | 1.02 | trnV-GAC | UCC | S    | 15 | 1.25 |
| UCA | S    | 444 | 1.29 | trnV-UAC | UCA | S    | 15 | 1.25 |
| UCG | S    | 184 | 0.53 |          | UCG | S    | 9  | 0.75 |
| AGU | S    | 404 | 1.17 | trnW-CCA | AGU | S    | 12 | 1    |
| AGC | S    | 129 | 0.37 |          | AGC | S    | 12 | 1    |
| UAA | STOP | 42  | 1.48 | trnY-GUA | UAA | STOP | 7  | 0.57 |
| UAG | STOP | 23  | 0.81 |          | UAG | STOP | 20 | 1.62 |
| UGA | STOP | 20  | 0.71 |          | UGA | STOP | 10 | 0.81 |

Supplementary Table 5. The codon-anticodon recognition pattern and codon usage for the *Meconopsis horridula* chloroplast genome.

| Codon | Amino |     |      | tRNA     | Codon | Amino |     |      |
|-------|-------|-----|------|----------|-------|-------|-----|------|
|       | Acid  | No. | RSCU |          |       | Acid  | No. | RSCU |
| UUU   | F     | 925 | 1.21 |          | UUU   | F     | 7   | 0.61 |
| UUC   | F     | 600 | 0.79 | trnA-UGC | UUC   | F     | 16  | 1.39 |
| UUA   | L     | 775 | 1.64 | trnA-UGC | UUA   | L     | 3   | 0.29 |
| UUG   | L     | 603 | 1.27 |          | UUG   | L     | 13  | 1.26 |
| CUU   | L     | 574 | 1.21 | trnC-GCA | CUU   | L     | 14  | 1.35 |
| CUC   | L     | 246 | 0.52 |          | CUC   | L     | 16  | 1.55 |
| CUA   | L     | 408 | 0.86 | trnD-GUC | CUA   | L     | 7   | 0.68 |
| CUG   | L     | 236 | 0.5  |          | CUG   | L     | 9   | 0.87 |
| AUU   | I     | 975 | 1.31 | trnE-UUC | AUU   | I     | 13  | 1.22 |

|     |   |     |      |           |     |   |    |      |
|-----|---|-----|------|-----------|-----|---|----|------|
| AUC | I | 542 | 0.73 | trnF-GAA  | AUC | I | 11 | 1.03 |
| AUA | I | 721 | 0.97 |           | AUA | I | 8  | 0.75 |
| AUG | M | 650 | 1    | trnfM-CAU | AUG | M | 7  | 1    |
| GUU | V | 509 | 1.35 |           | GUU | V | 14 | 1    |
| GUC | V | 222 | 0.59 | trnG-GCC  | GUC | V | 11 | 0.79 |
| GUA | V | 537 | 1.43 | trnG-UCC  | GUA | V | 17 | 1.21 |
| GUG | V | 239 | 0.63 |           | GUG | V | 14 | 1    |
| CCU | P | 370 | 1.34 | trnH-GUG  | CCU | P | 16 | 1.39 |
| CCC | P | 225 | 0.82 |           | CCC | P | 11 | 0.96 |
| CCA | P | 334 | 1.21 | trnI-CAU  | CCA | P | 9  | 0.78 |
| CCG | P | 172 | 0.62 | trnI-CAU  | CCG | P | 10 | 0.87 |
| ACU | T | 449 | 1.43 |           | ACU | T | 5  | 1.05 |
| ACC | T | 248 | 0.79 | trnI-GAU  | ACC | T | 7  | 1.47 |
| ACA | T | 398 | 1.27 | trnI-GAU  | ACA | T | 4  | 0.84 |
| ACG | T | 157 | 0.5  |           | ACG | T | 3  | 0.63 |
| GCU | A | 501 | 1.65 | trnK-UUU  | GCU | A | 14 | 1.27 |
| GCC | A | 211 | 0.69 |           | GCC | A | 9  | 0.82 |
| GCA | A | 356 | 1.17 | trnL-CAA  | GCA | A | 9  | 0.82 |
| GCG | A | 147 | 0.48 | trnL-CAA  | GCG | A | 12 | 1.09 |
| UAU | Y | 749 | 1.53 |           | UAU | Y | 4  | 1    |
| UAC | Y | 230 | 0.47 | trnL-UAA  | UAC | Y | 4  | 1    |
| CAU | H | 464 | 1.44 |           | CAU | H | 13 | 1.63 |
| CAC | H | 181 | 0.56 | trnL-UAG  | CAC | H | 3  | 0.38 |
| CAA | Q | 690 | 1.42 |           | CAA | Q | 11 | 0.96 |
| CAG | Q | 283 | 0.58 | trnM-CAU  | CAG | Q | 12 | 1.04 |

|     |   |      |      |          |     |   |    |      |
|-----|---|------|------|----------|-----|---|----|------|
| AAU | N | 847  | 1.46 | trnN-GUU | AAU | N | 13 | 1.3  |
| AAC | N | 310  | 0.54 |          | AAC | N | 7  | 0.7  |
| AAA | K | 1028 | 1.4  | trnN-GUU | AAA | K | 10 | 1.33 |
| AAG | K | 439  | 0.6  |          | AAG | K | 5  | 0.67 |
| GAU | D | 707  | 1.5  | trnP-UGG | GAU | D | 11 | 1.47 |
| GAC | D | 233  | 0.5  | trnQ-UUG | GAC | D | 4  | 0.53 |
| GAA | E | 881  | 1.41 |          | GAA | E | 13 | 0.81 |
| GAG | E | 369  | 0.59 | trnR-ACG | GAG | E | 19 | 1.19 |
| UGU | C | 237  | 1.32 |          | UGU | C | 12 | 1.14 |
| UGC | C | 121  | 0.68 | trnR-ACG | UGC | C | 9  | 0.86 |
| UGG | W | 458  | 1    | trnR-UCU | UGG | W | 16 | 1    |
| CGU | R | 292  | 1.11 |          | CGU | R | 8  | 0.7  |
| CGC | R | 103  | 0.39 | trnS-GCU | CGC | R | 7  | 0.61 |
| CGA | R | 339  | 1.29 |          | CGA | R | 9  | 0.78 |
| CGG | R | 154  | 0.59 | trnS-GGA | CGG | R | 16 | 1.39 |
| AGA | R | 474  | 1.8  |          | AGA | R | 12 | 1.04 |
| AGG | R | 217  | 0.82 | trnS-UGA | AGG | R | 17 | 1.48 |
| GGU | G | 523  | 1.25 |          | GGU | G | 28 | 1.47 |
| GGC | G | 181  | 0.43 | trnT-GGU | GGC | G | 16 | 0.84 |
| GGA | G | 627  | 1.5  |          | GGA | G | 15 | 0.79 |
| GGG | G | 340  | 0.81 | trnT-UGU | GGG | G | 17 | 0.89 |
| UCU | S | 507  | 1.6  |          | UCU | S | 9  | 0.65 |
| UCC | S | 321  | 1.01 | trnV-GAC | UCC | S | 14 | 1.01 |
| UCA | S | 403  | 1.27 |          | UCA | S | 16 | 1.16 |
| UCG | S | 200  | 0.63 | trnV-UAC | UCG | S | 16 | 1.16 |

|     |      |     |      |          |     |      |    |      |
|-----|------|-----|------|----------|-----|------|----|------|
| AGU | S    | 343 | 1.08 | trnW-CCA | AGU | S    | 11 | 0.8  |
| AGC | S    | 133 | 0.42 |          | AGC | S    | 17 | 1.23 |
| UAA | STOP | 217 | 1.04 | trnY-GUA | UAA | STOP | 11 | 1.18 |
| UAG | STOP | 209 | 1.01 |          | UAG | STOP | 11 | 1.18 |
| UGA | STOP | 197 | 0.95 |          | UGA | STOP | 6  | 0.64 |

Supplementary Table 6. RNA editing sites predicted in the chloroplast genome of *Meconopsis racemosa*.

| <b>Gene</b> |               |               |               |               |               |                  |                       |
|-------------|---------------|---------------|---------------|---------------|---------------|------------------|-----------------------|
| <b>Name</b> | <b>Length</b> | <b>Strand</b> | <b>Region</b> | <b>Nt pos</b> | <b>AA pos</b> | <b>Align Col</b> | <b>Effect</b>         |
|             |               |               |               |               |               |                  | TCG (S) => TTG<br>(L) |
| <i>accD</i> | 1461          | +             | LSC           | 794           | 265           | 288              |                       |
|             |               |               |               |               |               |                  | TCA (S) => TTA<br>(L) |
| <i>accD</i> | 1461          | +             | LSC           | 1157          | 386           | 421              |                       |
|             |               |               |               |               |               |                  | TCA (S) => TTA<br>(L) |
| <i>atpA</i> | 1524          | -             | LSC           | 773           | 258           | 258              |                       |
|             |               |               |               |               |               |                  | CCC (P) => CTC<br>(L) |
| <i>atpA</i> | 1524          | -             | LSC           | 791           | 264           | 264              |                       |
|             |               |               |               |               |               |                  | TCA (S) => TTA<br>(L) |
| <i>atpB</i> | 1497          | -             | LSC           | 1184          | 395           | 395              |                       |
|             |               |               |               |               |               |                  | CCA (P) => CTA<br>(L) |
| <i>atpF</i> | 555           | -             | LSC           | 92            | 31            | 31               |                       |
|             |               |               |               |               |               |                  | CGG (R) => TGG<br>(W) |
| <i>atpI</i> | 744           | -             | LSC           | 349           | 117           | 120              |                       |

|             |      |   |     |      |     |     |                       |
|-------------|------|---|-----|------|-----|-----|-----------------------|
| <i>atpI</i> | 744  | - | LSC | 629  | 210 | 213 | TCA (S) => TTA<br>(L) |
| <i>ccsA</i> | 975  | + | SSC | 634  | 212 | 221 | CAC (H) => TAC<br>(Y) |
| <i>clpP</i> | 609  | - | LSC | 224  | 75  | 75  | ACA (T) => ATA<br>(I) |
| <i>clpP</i> | 609  | - | LSC | 559  | 187 | 187 | CAT (H) => TAT<br>(Y) |
| <i>matK</i> | 1527 | - | LSC | 307  | 103 | 110 | CTT (L) => TTT (F)    |
| <i>matK</i> | 1527 | - | LSC | 445  | 149 | 159 | CAT (H) => TAT<br>(Y) |
| <i>matK</i> | 1527 | - | LSC | 469  | 157 | 167 | CAC (H) => TAC<br>(Y) |
| <i>matK</i> | 1527 | - | LSC | 655  | 219 | 229 | CAT (H) => TAT<br>(Y) |
| <i>matK</i> | 1527 | - | LSC | 1000 | 334 | 344 | CTT (L) => TTT (F)    |
| <i>matK</i> | 1527 | - | LSC | 1426 | 476 | 486 | CCT (P) => TCT<br>(S) |
| <i>ndhA</i> | 1089 | - | SSC | 107  | 36  | 36  | CCT (P) => CTT<br>(L) |
| <i>ndhA</i> | 1089 | - | SSC | 341  | 114 | 114 | TCA (S) => TTA<br>(L) |
| <i>ndhA</i> | 1089 | - | SSC | 566  | 189 | 189 | TCA (S) => TTA<br>(L) |

|             |      |   |     |      |     |     |                       |
|-------------|------|---|-----|------|-----|-----|-----------------------|
| <i>ndhB</i> | 1533 | + | IR  | 149  | 50  | 50  | TCA (S) => TTA<br>(L) |
| <i>ndhB</i> | 1533 | + | IR  | 467  | 156 | 156 | CCA (P) => CTA<br>(L) |
| <i>ndhB</i> | 1533 | + | IR  | 542  | 181 | 181 | ACG (T) => ATG<br>(M) |
| <i>ndhB</i> | 1533 | + | IR  | 586  | 196 | 196 | CAT (H) => TAT<br>(Y) |
| <i>ndhB</i> | 1533 | + | IR  | 611  | 204 | 204 | TCA (S) => TTA<br>(L) |
| <i>ndhB</i> | 1533 | + | IR  | 737  | 246 | 246 | CCA (P) => CTA<br>(L) |
| <i>ndhB</i> | 1533 | + | IR  | 746  | 249 | 249 | TCT (S) => TTT (F)    |
| <i>ndhB</i> | 1533 | + | IR  | 830  | 277 | 277 | TCA (S) => TTA<br>(L) |
| <i>ndhB</i> | 1533 | + | IR  | 836  | 279 | 279 | TCA (S) => TTA<br>(L) |
| <i>ndhB</i> | 1533 | + | IR  | 902  | 301 | 301 | ACC (T) => ATC<br>(I) |
| <i>ndhB</i> | 1533 | + | IR  | 1255 | 419 | 419 | CAT (H) => TAT<br>(Y) |
| <i>ndhB</i> | 1533 | + | IR  | 1481 | 494 | 494 | CCA (P) => CTA<br>(L) |
| <i>ndhD</i> | 1503 | - | SSC | 985  | 329 | 329 | CCC (P) => TCC<br>(S) |

|             |      |   |     |      |     |     |                                      |
|-------------|------|---|-----|------|-----|-----|--------------------------------------|
| <i>ndhD</i> | 1503 | - | SSC | 1081 | 361 | 361 | CCA (P) => TCA<br>(S)                |
| <i>ndhD</i> | 1503 | - | SSC | 1150 | 384 | 384 | CAT (H) => TAT<br>(Y)                |
| <i>ndhD</i> | 1503 | - | SSC | 1414 | 472 | 479 | CTT (L) => TTT (F)<br>CCA (P) => CTA |
| <i>ndhF</i> | 2219 | - | SSC | 128  | 43  | 43  | (L)<br>CCT (P) => CTT                |
| <i>ndhF</i> | 2219 | - | SSC | 185  | 62  | 63  | (L)<br>CCG (P) => TCG                |
| <i>ndhF</i> | 2219 | - | SSC | 193  | 65  | 66  | (S)<br>ACA (T) => ATA                |
| <i>ndhF</i> | 2219 | - | SSC | 305  | 102 | 106 | (I)<br>ACG (T) => ATG                |
| <i>ndhF</i> | 2219 | - | SSC | 383  | 128 | 132 | (M)<br>CCT (P) => TCT                |
| <i>ndhF</i> | 2219 | - | SSC | 511  | 171 | 175 | (S)<br>TCA (S) => TTA                |
| <i>ndhF</i> | 2219 | - | SSC | 521  | 174 | 178 | (L)<br>CCT (P) => CTT                |
| <i>ndhF</i> | 2219 | - | SSC | 902  | 301 | 305 | (L)<br>TCG (S) => TTG                |
| <i>ndhF</i> | 2219 | - | SSC | 953  | 318 | 326 | (L)<br>TCA (S) => TTA                |
| <i>ndhF</i> | 2219 | - | SSC | 965  | 322 | 330 | (L)                                  |



|             |      |   |     |      |     |     |                                             |
|-------------|------|---|-----|------|-----|-----|---------------------------------------------|
| <i>ndhF</i> | 2219 | - | SSC | 1106 | 369 | 377 | CCA (P) => CTA<br>(L)                       |
| <i>ndhF</i> | 2219 | - | SSC | 1138 | 380 | 388 | CCG (P) => TCG<br>(S)                       |
| <i>ndhF</i> | 2219 | - | SSC | 1282 | 428 | 438 | CTT (L) => TTT (F)<br>CCC (P) => TTC<br>(F) |
| <i>ndhF</i> | 2219 | - | SSC | 1402 | 468 | 478 | CCC (P) => TTC<br>(F)                       |
| <i>ndhF</i> | 2219 | - | SSC | 1403 | 468 | 478 | CCT (P) => TCT<br>(S)                       |
| <i>ndhF</i> | 2219 | - | SSC | 1861 | 621 | 641 | CAT (H) => TAT<br>(Y)                       |
| <i>ndhG</i> | 531  | - | SSC | 148  | 50  | 50  | CCA (P) => CTA<br>(L)                       |
| <i>ndhG</i> | 531  | - | SSC | 155  | 52  | 52  | CAT (H) => TAT<br>(Y)                       |
| <i>ndhG</i> | 531  | - | SSC | 166  | 56  | 56  | ACA (T) => ATA<br>(I)                       |
| <i>ndhG</i> | 531  | - | SSC | 314  | 105 | 105 | CGG (R) => TGG<br>(W)                       |
| <i>petB</i> | 648  | + | LSC | 418  | 140 | 140 | CCA (P) => CTA<br>(L)                       |
| <i>petB</i> | 648  | + | LSC | 611  | 204 | 204 | TCG (S) => TTG<br>(L)                       |
| <i>psbE</i> | 252  | - | LSC | 200  | 67  | 67  |                                             |

|              |      |   |     |      |     |     |                                      |
|--------------|------|---|-----|------|-----|-----|--------------------------------------|
| <i>psbF</i>  | 120  | - | LSC | 77   | 26  | 26  | TCT (S) => TTT (F)<br>CCA (P) => TCA |
| <i>rpl2</i>  | 825  | + | IR  | 19   | 7   | 12  | (S)<br>CCC (P) => CTC                |
| <i>rpl2</i>  | 825  | + | IR  | 524  | 175 | 182 | (L)<br>GCT (A) => GTT                |
| <i>rpl2</i>  | 825  | + | IR  | 575  | 192 | 199 | (V)<br>CAC (H) => TAC                |
| <i>rpl20</i> | 354  | - | LSC | 256  | 86  | 86  | (Y)<br>TCA (S) => TTA                |
| <i>rpl20</i> | 354  | - | LSC | 308  | 103 | 103 | (L)<br>TCA (S) => TTA                |
| <i>rpoA</i>  | 1035 | - | LSC | 368  | 123 | 123 | (L)<br>TCA (S) => TTA                |
| <i>rpoA</i>  | 1035 | - | LSC | 830  | 277 | 279 | (L)<br>TCA (S) => TTA                |
| <i>rpoB</i>  | 3213 | - | LSC | 473  | 158 | 159 | (L)<br>TCG (S) => TTG                |
| <i>rpoB</i>  | 3213 | - | LSC | 566  | 189 | 190 | (L)<br>CCG (P) => CTG                |
| <i>rpoB</i>  | 3213 | - | LSC | 623  | 208 | 209 | (L)<br>TCA (S) => TTA                |
| <i>rpoB</i>  | 3213 | - | LSC | 2426 | 809 | 827 | (L)                                  |
| <i>rpoB</i>  | 3213 | - | LSC | 2498 | 833 | 851 | ACT (T) => ATT (I)                   |

|              |      |   |     |      |      |      |                                      |
|--------------|------|---|-----|------|------|------|--------------------------------------|
| <i>rpoC1</i> | 2049 | - | LSC | 41   | 14   | 14   | TCA (S) => TTA<br>(L)                |
| <i>rpoC2</i> | 4164 | - | LSC | 1493 | 498  | 517  | ACG (T) => ATG<br>(M)                |
| <i>rpoC2</i> | 4164 | - | LSC | 1586 | 529  | 548  | TCT (S) => TTT (F)<br>CGT (R) => TGT |
| <i>rpoC2</i> | 4164 | - | LSC | 1774 | 592  | 613  | (C)<br>CGG (R) => TGG                |
| <i>rpoC2</i> | 4164 | - | LSC | 2293 | 765  | 950  | (W)<br>TCG (S) => TTG                |
| <i>rpoC2</i> | 4164 | - | LSC | 2792 | 931  | 1124 | (L)<br>CCT (P) => TCT                |
| <i>rpoC2</i> | 4164 | - | LSC | 2818 | 940  | 1133 | (S)<br>TCA (S) => TTA                |
| <i>rpoC2</i> | 4164 | - | LSC | 3728 | 1243 | 1455 | (L)<br>TCA (S) => TTA                |
| <i>rps2</i>  | 711  | + | LSC | 248  | 83   | 83   | (L)<br>TCA (S) => TTA                |
| <i>rps2</i>  | 711  | + | LSC | 314  | 105  | 105  | (L)<br>CCG (P) => TCG                |
| <i>rps8</i>  | 399  | - | LSC | 43   | 15   | 15   | (S)<br>TCG (S) => TTG                |
| <i>rps8</i>  | 399  | - | LSC | 122  | 41   | 42   | (L)<br>TCG (S) => TTG                |
| <i>rps8</i>  | 399  | - | LSC | 326  | 109  | 113  | (L)                                  |

|              |     |   |     |     |     |     |                       |
|--------------|-----|---|-----|-----|-----|-----|-----------------------|
| <i>rps8</i>  | 399 | - | LSC | 392 | 131 | 135 | CCT (P) => CTT<br>(L) |
| <i>rps8</i>  | 399 | - | LSC | 397 | 133 | 137 | CAT (H) => TAT<br>(Y) |
| <i>rps14</i> | 303 | - | LSC | 149 | 50  | 53  | CCA (P) => CTA<br>(L) |
| <i>rps16</i> | 267 | - | LSC | 143 | 48  | 48  | TCA (S) => TTA<br>(L) |
| <i>rps16</i> | 267 | - | LSC | 212 | 71  | 71  | TCA (S) => TTA<br>(L) |
| <i>ycf3</i>  | 507 | - | LSC | 44  | 15  | 15  | TCT (S) => TTT (F)    |
| <i>ycf3</i>  | 507 | - | LSC | 407 | 136 | 136 | TCC (S) => TTC<br>(F) |

Supplementary Table 7. RNA editing sites predicted in the chloroplast genome of *Meconopsis integrifolia* (Maxim.) Franch.

| <b>Gene Name</b> | <b>Length</b> | <b>Strand</b> | <b>Region</b> | <b>Nt pos</b> | <b>AA pos</b> | <b>Align Col</b> | <b>Effect</b>         |
|------------------|---------------|---------------|---------------|---------------|---------------|------------------|-----------------------|
| <i>accD</i>      | 1479          | +             | LSC           | 812           | 271           | 293              | TCG (S) => TTG<br>(L) |
| <i>accD</i>      | 1479          | +             | LSC           | 1175          | 392           | 426              | TCA (S) => TTA<br>(L) |
| <i>atpA</i>      | 1524          | -             | LSC           | 773           | 258           | 258              | TCA (S) => TTA<br>(L) |

|             |      |   |     |      |     |     |                       |
|-------------|------|---|-----|------|-----|-----|-----------------------|
| <i>atpB</i> | 1497 | - | LSC | 1184 | 395 | 395 | TCA (S) => TTA<br>(L) |
| <i>atpF</i> | 555  | - | LSC | 92   | 31  | 31  | CCA (P) => CTA<br>(L) |
| <i>ccsA</i> | 969  | + | SSC | 634  | 212 | 221 | CAC (H) => TAC<br>(Y) |
| <i>clpP</i> | 609  | - | LSC | 224  | 75  | 75  | ACA (T) => ATA<br>(I) |
| <i>clpP</i> | 609  | - | LSC | 559  | 187 | 187 | CAT (H) => TAT<br>(Y) |
| <i>matK</i> | 1527 | - | LSC | 307  | 103 | 110 | CTT (L) => TTT<br>(F) |
| <i>matK</i> | 1527 | - | LSC | 445  | 149 | 159 | CAT (H) => TAT<br>(Y) |
| <i>matK</i> | 1527 | - | LSC | 469  | 157 | 167 | CAC (H) => TAC<br>(Y) |
| <i>matK</i> | 1527 | - | LSC | 655  | 219 | 229 | CAT (H) => TAT<br>(Y) |
| <i>matK</i> | 1527 | - | LSC | 1000 | 334 | 344 | CTT (L) => TTT<br>(F) |
| <i>matK</i> | 1527 | - | LSC | 1426 | 476 | 486 | CCT (P) => TCT<br>(S) |
| <i>ndhA</i> | 1089 | - | SSC | 107  | 36  | 36  | CCT (P) => CTT<br>(L) |

|             |      |   |     |     |     |     |                       |
|-------------|------|---|-----|-----|-----|-----|-----------------------|
| <i>ndhA</i> | 1089 | - | SSC | 341 | 114 | 114 | TCA (S) => TTA<br>(L) |
| <i>ndhA</i> | 1089 | - | SSC | 566 | 189 | 189 | TCA (S) => TTA<br>(L) |
| <i>ndhB</i> | 1533 | + | IR  | 149 | 50  | 50  | TCA (S) => TTA<br>(L) |
| <i>ndhB</i> | 1533 | + | IR  | 467 | 156 | 156 | CCA (P) => CTA<br>(L) |
| <i>ndhB</i> | 1533 | + | IR  | 542 | 181 | 181 | ACG (T) => ATG<br>(M) |
| <i>ndhB</i> | 1533 | + | IR  | 586 | 196 | 196 | CAT (H) => TAT<br>(Y) |
| <i>ndhB</i> | 1533 | + | IR  | 611 | 204 | 204 | TCA (S) => TTA<br>(L) |
| <i>ndhB</i> | 1533 | + | IR  | 737 | 246 | 246 | CCA (P) => CTA<br>(L) |
| <i>ndhB</i> | 1533 | + | IR  | 746 | 249 | 249 | TCT (S) => TTT<br>(F) |
| <i>ndhB</i> | 1533 | + | IR  | 830 | 277 | 277 | TCA (S) => TTA<br>(L) |
| <i>ndhB</i> | 1533 | + | IR  | 836 | 279 | 279 | TCA (S) => TTA<br>(L) |
| <i>ndhB</i> | 1533 | + | IR  | 902 | 301 | 301 | ACC (T) => ATC<br>(I) |

|             |      |   |     |      |     |     |                       |
|-------------|------|---|-----|------|-----|-----|-----------------------|
| <i>ndhB</i> | 1533 | + | IR  | 1255 | 419 | 419 | CAT (H) => TAT<br>(Y) |
| <i>ndhB</i> | 1533 | + | IR  | 1481 | 494 | 494 | CCA (P) => CTA<br>(L) |
| <i>ndhD</i> | 1503 | - | SSC | 2    | 1   | 1   | ACG (T) => ATG<br>(M) |
| <i>ndhD</i> | 1503 | - | SSC | 313  | 105 | 105 | CGG (R) => TGG<br>(W) |
| <i>ndhD</i> | 1503 | - | SSC | 383  | 128 | 128 | CCT (P) => CTT<br>(L) |
| <i>ndhD</i> | 1503 | - | SSC | 887  | 296 | 296 | CCT (P) => CTT<br>(L) |
| <i>ndhD</i> | 1503 | - | SSC | 947  | 316 | 316 | ACA (T) => ATA<br>(I) |
| <i>ndhD</i> | 1503 | - | SSC | 1298 | 433 | 433 | TCA (S) => TTA<br>(L) |
| <i>ndhD</i> | 1503 | - | SSC | 1310 | 437 | 437 | TCA (S) => TTA<br>(L) |
| <i>ndhF</i> | 2220 | - | SSC | 392  | 131 | 131 | TCC (S) => TTC<br>(F) |
| <i>ndhF</i> | 2220 | - | SSC | 586  | 196 | 196 | CTT (L) => TTT<br>(F) |
| <i>ndhF</i> | 2220 | - | SSC | 623  | 208 | 208 | TCG (S) => TTG<br>(L) |

|             |      |   |     |      |     |     |                       |
|-------------|------|---|-----|------|-----|-----|-----------------------|
| <i>ndhF</i> | 2220 | - | SSC | 1385 | 462 | 462 | TCT (S) => TTT<br>(F) |
| <i>ndhF</i> | 2220 | - | SSC | 1567 | 523 | 526 | CTT (L) => TTT<br>(F) |
| <i>ndhF</i> | 2220 | - | SSC | 1846 | 616 | 625 | CTT (L) => TTT<br>(F) |
| <i>ndhF</i> | 2220 | - | SSC | 2177 | 726 | 735 | TCA (S) => TTA<br>(L) |
| <i>ndhG</i> | 531  | - | SSC | 148  | 50  | 50  | CAT (H) => TAT<br>(Y) |
| <i>ndhG</i> | 531  | - | SSC | 155  | 52  | 52  | CCA (P) => CTA<br>(L) |
| <i>ndhG</i> | 531  | - | SSC | 166  | 56  | 56  | CAT (H) => TAT<br>(Y) |
| <i>ndhG</i> | 531  | - | SSC | 314  | 105 | 105 | ACA (T) => ATA<br>(I) |
| <i>petB</i> | 648  | + | LSC | 418  | 140 | 140 | CGG (R) => TGG<br>(W) |
| <i>petB</i> | 648  | + | LSC | 611  | 204 | 204 | CCA (P) => CTA<br>(L) |
| <i>psbE</i> | 252  | - | LSC | 214  | 72  | 72  | CCT (P) => TCT<br>(S) |
| <i>psbF</i> | 120  | - | LSC | 77   | 26  | 26  | TCT (S) => TTT<br>(F) |



|              |      |   |     |      |     |     |                       |
|--------------|------|---|-----|------|-----|-----|-----------------------|
| <i>rpl2</i>  | 825  | + | IR  | 2    | 1   | 1   | ACG (T) => ATG<br>(M) |
| <i>rpl20</i> | 354  | - | LSC | 256  | 86  | 86  | CAC (H) => TAC<br>(Y) |
| <i>rpl20</i> | 354  | - | LSC | 308  | 103 | 103 | TCA (S) => TTA<br>(L) |
| <i>rpoA</i>  | 1035 | - | LSC | 368  | 123 | 123 | TCA (S) => TTA<br>(L) |
| <i>rpoA</i>  | 1035 | - | LSC | 830  | 277 | 279 | TCA (S) => TTA<br>(L) |
| <i>rpoB</i>  | 3213 | - | LSC | 473  | 158 | 159 | TCA (S) => TTA<br>(L) |
| <i>rpoB</i>  | 3213 | - | LSC | 566  | 189 | 190 | TCG (S) => TTG<br>(L) |
| <i>rpoB</i>  | 3213 | - | LSC | 623  | 208 | 209 | CCG (P) => CTG<br>(L) |
| <i>rpoB</i>  | 3213 | - | LSC | 2248 | 750 | 768 | CCA (P) => TCA<br>(S) |
| <i>rpoB</i>  | 3213 | - | LSC | 2426 | 809 | 827 | TCA (S) => TTA<br>(L) |
| <i>rpoC1</i> | 2049 | - | LSC | 41   | 14  | 14  | TCA (S) => TTA<br>(L) |
| <i>rpoC1</i> | 2049 | - | LSC | 959  | 320 | 337 | TCA (S) => TTA<br>(L) |

|              |      |   |     |      |      |      |                       |
|--------------|------|---|-----|------|------|------|-----------------------|
| <i>rpoC1</i> | 2049 | - | LSC | 1447 | 483  | 500  | CGC (R) => TGC<br>(C) |
| <i>rpoC2</i> | 4158 | - | LSC | 1493 | 498  | 517  | ACG (T) => ATG<br>(M) |
| <i>rpoC2</i> | 4158 | - | LSC | 1586 | 529  | 548  | TCT (S) => TTT<br>(F) |
| <i>rpoC2</i> | 4158 | - | LSC | 1774 | 592  | 613  | CGT (R) => TGT<br>(C) |
| <i>rpoC2</i> | 4158 | - | LSC | 2287 | 763  | 948  | CGG (R) => TGG<br>(W) |
| <i>rpoC2</i> | 4158 | - | LSC | 2812 | 938  | 1131 | CCT (P) => TCT<br>(S) |
| <i>rpoC2</i> | 4158 | - | LSC | 3722 | 1241 | 1453 | TCA (S) => TTA<br>(L) |
| <i>rps2</i>  | 711  | - | LSC | 248  | 83   | 83   | TCA (S) => TTA<br>(L) |
| <i>rps2</i>  | 711  | - | LSC | 314  | 105  | 105  | TCA (S) => TTA<br>(L) |
| <i>rps8</i>  | 399  | - | LSC | 182  | 61   | 61   | TCA (S) => TTA<br>(L) |
| <i>rps14</i> | 303  | - | LSC | 149  | 50   | 53   | CCA (P) => CTA<br>(L) |
| <i>rps16</i> | 267  | - | LSC | 143  | 48   | 48   | TCA (S) => TTA<br>(L) |

|              |     |   |     |     |     |     |                       |
|--------------|-----|---|-----|-----|-----|-----|-----------------------|
| <i>rps16</i> | 267 | - | LSC | 212 | 71  | 71  | TCA (S) => TTA<br>(L) |
| <i>ycf3</i>  | 507 | - | LSC | 44  | 15  | 15  | TCT (S) => TTT<br>(F) |
| <i>ycf3</i>  | 507 | - | LSC | 407 | 136 | 136 | TCC (S) => TTC<br>(F) |

Supplementary Table 8. RNA editing sites predicted in the chloroplast genome of *Meconopsis horridula*.

| <b>Gene</b> |               |               |               |               |               | <b>Align</b> |                       |
|-------------|---------------|---------------|---------------|---------------|---------------|--------------|-----------------------|
| <b>Name</b> | <b>Length</b> | <b>Strand</b> | <b>Region</b> | <b>Nt pos</b> | <b>AA pos</b> | <b>Col</b>   | <b>Effect</b>         |
| <i>accD</i> | 1461          | +             | LSC           | 794           | 265           | 288          | TCG (S) => TTG<br>(L) |
| <i>accD</i> | 1461          | +             | LSC           | 1157          | 386           | 421          | TCA (S) => TTA<br>(L) |
| <i>atpA</i> | 1524          | -             | LSC           | 773           | 258           | 258          | TCA (S) => TTA<br>(L) |
| <i>atpA</i> | 1524          | -             | LSC           | 791           | 264           | 264          | CCC (P) => CTC<br>(L) |
| <i>atpB</i> | 1497          | -             | LSC           | 1184          | 395           | 395          | TCA (S) => TTA<br>(L) |
| <i>atpF</i> | 555           | -             | LSC           | 92            | 31            | 31           | CCA (P) => CTA<br>(L) |
| <i>atpI</i> | 744           | -             | LSC           | 349           | 117           | 120          | CGG (R) => TGG<br>(W) |

|             |      |   |     |     |     |     |                       |
|-------------|------|---|-----|-----|-----|-----|-----------------------|
| <i>atpI</i> | 744  | - | LSC | 629 | 210 | 213 | TCA (S) => TTA<br>(L) |
| <i>ccsA</i> | 975  | + | SSC | 634 | 212 | 221 | CAC (H) => TAC<br>(Y) |
| <i>clpP</i> | 609  | - | LSC | 224 | 75  | 75  | ACA (T) => ATA<br>(I) |
| <i>clpP</i> | 609  | - | LSC | 559 | 187 | 187 | CAT (H) => TAT<br>(Y) |
| <i>matK</i> | 1527 | - | LSC | 52  | 18  | 18  | CTT (L) => TTT (F)    |
| <i>matK</i> | 1527 | - | LSC | 283 | 95  | 95  | CTT (L) => TTT (F)    |
| <i>matK</i> | 1527 | - | LSC | 362 | 121 | 124 | CCC (P) => CTC<br>(L) |
| <i>matK</i> | 1527 | - | LSC | 479 | 160 | 163 | ACT (T) => ATT (I)    |
| <i>matK</i> | 1527 | - | LSC | 650 | 217 | 220 | TCC (S) => TTC<br>(F) |
| <i>matK</i> | 1527 | - | LSC | 715 | 239 | 242 | CCA (P) => TCA<br>(S) |
| <i>ndhA</i> | 1089 | - | SSC | 107 | 36  | 36  | CCT (P) => CTT<br>(L) |
| <i>ndhA</i> | 1089 | - | SSC | 341 | 114 | 114 | TCA (S) => TTA<br>(L) |
| <i>ndhA</i> | 1089 | - | SSC | 566 | 189 | 189 | TCA (S) => TTA<br>(L) |
| <i>ndhB</i> | 1533 | - | IR  | 149 | 50  | 50  | TCA (S) => TTA<br>(L) |

|             |      |   |     |      |     |     |                       |
|-------------|------|---|-----|------|-----|-----|-----------------------|
| <i>ndhB</i> | 1533 | - | IR  | 467  | 156 | 156 | CCA (P) => CTA<br>(L) |
| <i>ndhB</i> | 1533 | - | IR  | 542  | 181 | 181 | ACG (T) => ATG<br>(M) |
| <i>ndhB</i> | 1533 | - | IR  | 586  | 196 | 196 | CAT (H) => TAT<br>(Y) |
| <i>ndhB</i> | 1533 | - | IR  | 611  | 204 | 204 | TCA (S) => TTA<br>(L) |
| <i>ndhB</i> | 1533 | - | IR  | 737  | 246 | 246 | CCA (P) => CTA<br>(L) |
| <i>ndhB</i> | 1533 | - | IR  | 746  | 249 | 249 | TCT (S) => TTT (F)    |
| <i>ndhB</i> | 1533 | - | IR  | 830  | 277 | 277 | TCA (S) => TTA<br>(L) |
| <i>ndhB</i> | 1533 | - | IR  | 836  | 279 | 279 | TCA (S) => TTA<br>(L) |
| <i>ndhB</i> | 1533 | - | IR  | 902  | 301 | 301 | ACC (T) => ATC<br>(I) |
| <i>ndhB</i> | 1533 | - | IR  | 1255 | 419 | 419 | CAT (H) => TAT<br>(Y) |
| <i>ndhB</i> | 1533 | - | IR  | 1481 | 494 | 494 | CCA (P) => CTA<br>(L) |
| <i>ndhD</i> | 1503 | - | SSC | 2    | 1   | 1   | ACG (T) => ATG<br>(M) |
| <i>ndhD</i> | 1503 | - | SSC | 313  | 105 | 105 | CGG (R) => TGG<br>(W) |

|             |      |   |     |      |     |     |                                      |
|-------------|------|---|-----|------|-----|-----|--------------------------------------|
| <i>ndhD</i> | 1503 | - | SSC | 383  | 128 | 128 | CCT (P) => CTT<br>(L)                |
| <i>ndhD</i> | 1503 | - | SSC | 674  | 225 | 225 | TCA (S) => TTA<br>(L)                |
| <i>ndhD</i> | 1503 | - | SSC | 887  | 296 | 296 | CCT (P) => CTT<br>(L)                |
| <i>ndhD</i> | 1503 | - | SSC | 947  | 316 | 316 | ACA (T) => ATA<br>(I)                |
| <i>ndhD</i> | 1503 | - | SSC | 1298 | 433 | 433 | TCA (S) => TTA<br>(L)                |
| <i>ndhD</i> | 1503 | - | SSC | 1310 | 437 | 437 | TCA (S) => TTA<br>(L)                |
| <i>ndhF</i> | 2219 | - | SSC | 392  | 131 | 131 | TCC (S) => TTC<br>(F)                |
| <i>ndhF</i> | 2219 | - | SSC | 586  | 196 | 196 | CTT (L) => TTT (F)<br>TCG (S) => TTG |
| <i>ndhF</i> | 2219 | - | SSC | 623  | 208 | 208 | (L)                                  |
| <i>ndhF</i> | 2219 | - | SSC | 1385 | 462 | 462 | TCT (S) => TTT (F)                   |
| <i>ndhF</i> | 2219 | - | SSC | 1567 | 523 | 526 | CTT (L) => TTT (F)                   |
| <i>ndhF</i> | 2219 | - | SSC | 1691 | 564 | 568 | ACT (T) => ATT (I)                   |
| <i>ndhF</i> | 2219 | - | SSC | 1846 | 616 | 625 | CTT (L) => TTT (F)<br>TCA (S) => TTA |
| <i>ndhF</i> | 2219 | - | SSC | 2177 | 726 | 735 | (L)                                  |
| <i>ndhG</i> | 531  | - | SSC | 148  | 50  | 50  | CAT (H) => TAT<br>(Y)                |

|              |      |   |     |     |     |     |                       |
|--------------|------|---|-----|-----|-----|-----|-----------------------|
| <i>ndhG</i>  | 531  | - | SSC | 155 | 52  | 52  | CCA (P) => CTA<br>(L) |
| <i>ndhG</i>  | 531  | - | SSC | 166 | 56  | 56  | CAT (H) => TAT<br>(Y) |
| <i>ndhG</i>  | 531  | - | SSC | 314 | 105 | 105 | ACA (T) => ATA<br>(I) |
| <i>petB</i>  | 648  | + | LSC | 418 | 140 | 140 | CGG (R) => TGG<br>(W) |
| <i>petB</i>  | 648  | + | LSC | 611 | 204 | 204 | CCA (P) => CTA<br>(L) |
| <i>psbE</i>  | 252  | - | LSC | 214 | 72  | 72  | CCT (P) => TCT<br>(S) |
| <i>psbF</i>  | 120  | - | LSC | 77  | 26  | 26  | TCT (S) => TTT (F)    |
| <i>psbL</i>  | 117  | - | LSC | 74  | 25  | 32  | TCT (S) => TTT (F)    |
| <i>rpl2</i>  | 825  | + | IR  | 2   | 1   | 1   | ACG (T) => ATG<br>(M) |
| <i>rpl20</i> | 354  | - | LSC | 256 | 86  | 86  | CAC (H) => TAC<br>(Y) |
| <i>rpl20</i> | 354  | - | LSC | 308 | 103 | 103 | TCA (S) => TTA<br>(L) |
| <i>rpoA</i>  | 1035 | - | LSC | 368 | 123 | 123 | TCA (S) => TTA<br>(L) |
| <i>rpoA</i>  | 1035 | - | LSC | 830 | 277 | 279 | TCA (S) => TTA<br>(L) |

|              |      |   |     |      |      |      |                       |
|--------------|------|---|-----|------|------|------|-----------------------|
| <i>rpoB</i>  | 3213 | - | LSC | 473  | 158  | 159  | TCA (S) => TTA<br>(L) |
| <i>rpoB</i>  | 3213 | - | LSC | 566  | 189  | 190  | TCG (S) => TTG<br>(L) |
| <i>rpoB</i>  | 3213 | - | LSC | 623  | 208  | 209  | CCG (P) => CTG<br>(L) |
| <i>rpoB</i>  | 3213 | - | LSC | 2426 | 809  | 827  | TCA (S) => TTA<br>(L) |
| <i>rpoB</i>  | 3213 | - | LSC | 2498 | 833  | 851  | ACT (T) => ATT (I)    |
| <i>rpoC1</i> | 2049 | - | LSC | 41   | 14   | 14   | TCA (S) => TTA<br>(L) |
| <i>rpoC1</i> | 2049 | - | LSC | 1946 | 649  | 674  | ACT (T) => ATT (I)    |
| <i>rpoC2</i> | 4164 | - | LSC | 1493 | 498  | 517  | ACG (T) => ATG<br>(M) |
| <i>rpoC2</i> | 4164 | - | LSC | 1586 | 529  | 548  | TCT (S) => TTT (F)    |
| <i>rpoC2</i> | 4164 | - | LSC | 1774 | 592  | 613  | CGT (R) => TGT<br>(C) |
| <i>rpoC2</i> | 4164 | - | LSC | 2293 | 765  | 950  | CGG (R) => TGG<br>(W) |
| <i>rpoC2</i> | 4164 | - | LSC | 2792 | 931  | 1124 | TCG (S) => TTG<br>(L) |
| <i>rpoC2</i> | 4164 | - | LSC | 2818 | 940  | 1133 | CCT (P) => TCT<br>(S) |
| <i>rpoC2</i> | 4164 | - | LSC | 3728 | 1243 | 1455 | TCA (S) => TTA<br>(L) |



|              |     |   |     |     |     |     |                       |
|--------------|-----|---|-----|-----|-----|-----|-----------------------|
| <i>rps2</i>  | 711 | - | LSC | 248 | 83  | 83  | TCA (S) => TTA<br>(L) |
| <i>rps2</i>  | 711 | - | LSC | 314 | 105 | 105 | TCA (S) => TTA<br>(L) |
| <i>rps8</i>  | 399 | - | LSC | 182 | 61  | 61  | TCA (S) => TTA<br>(L) |
| <i>rps14</i> | 303 | - | LSC | 149 | 50  | 53  | CCA (P) => CTA<br>(L) |
| <i>rps16</i> | 267 | - | LSC | 143 | 48  | 48  | TCA (S) => TTA<br>(L) |
| <i>rps16</i> | 267 | - | LSC | 212 | 71  | 71  | TCA (S) => TTA<br>(L) |
| <i>ycf3</i>  | 507 | - | LSC | 44  | 15  | 15  | TCT (S) => TTT (F)    |
| <i>ycf3</i>  | 507 | - | LSC | 407 | 136 | 136 | TCC (S) => TTC<br>(F) |

Supplementary Table 9. RNA editing sites predicted in the chloroplast genome of *Meconopsis punicea*.

| <b>Gene</b> |               |               |               |               |               |                  |                       |
|-------------|---------------|---------------|---------------|---------------|---------------|------------------|-----------------------|
| <b>Name</b> | <b>Length</b> | <b>Strand</b> | <b>Region</b> | <b>Nt pos</b> | <b>AA pos</b> | <b>Align Col</b> | <b>Effect</b>         |
| <i>accD</i> | 1461          | +             | LSC           | 794           | 265           | 288              | TCG (S) => TTG<br>(L) |
| <i>accD</i> | 1461          | +             | LSC           | 1157          | 386           | 421              | TCA (S) => TTA<br>(L) |

|             |      |   |     |      |     |     |                                      |
|-------------|------|---|-----|------|-----|-----|--------------------------------------|
| <i>atpA</i> | 1524 | - | LSC | 773  | 258 | 258 | TCA (S) => TTA<br>(L)                |
| <i>atpA</i> | 1524 | - | LSC | 791  | 264 | 264 | CCC (P) => CTC<br>(L)                |
| <i>atpB</i> | 1497 | - | LSC | 1184 | 395 | 395 | TCA (S) => TTA<br>(L)                |
| <i>atpF</i> | 555  | - | LSC | 92   | 31  | 31  | CCA (P) => CTA<br>(L)                |
| <i>atpI</i> | 744  | - | LSC | 349  | 117 | 120 | CGG (R) => TGG<br>(W)                |
| <i>atpI</i> | 744  | - | LSC | 629  | 210 | 213 | TCA (S) => TTA<br>(L)                |
| <i>ccsA</i> | 969  | + | SSC | 634  | 212 | 221 | CAC (H) => TAC<br>(Y)                |
| <i>clpP</i> | 609  | - | LSC | 224  | 75  | 75  | ACA (T) => ATA<br>(I)                |
| <i>clpP</i> | 609  | - | LSC | 503  | 168 | 168 | GCT (A) => GTT<br>(V)                |
| <i>clpP</i> | 609  | - | LSC | 559  | 187 | 187 | CAT (H) => TAT<br>(Y)                |
| <i>matK</i> | 1527 | - | LSC | 52   | 18  | 18  | CTT (L) => TTT (F)                   |
| <i>matK</i> | 1527 | - | LSC | 283  | 95  | 95  | CTT (L) => TTT (F)<br>CCC (P) => CTC |
| <i>matK</i> | 1527 | - | LSC | 362  | 121 | 124 | (L)                                  |
| <i>matK</i> | 1527 | - | LSC | 479  | 160 | 163 | ACT (T) => ATT (I)                   |

|             |      |   |     |      |     |     |                       |
|-------------|------|---|-----|------|-----|-----|-----------------------|
| <i>matK</i> | 1527 | - | LSC | 650  | 217 | 220 | TCC (S) => TTC<br>(F) |
| <i>matK</i> | 1527 | - | LSC | 715  | 239 | 242 | CCA (P) => TCA<br>(S) |
| <i>matK</i> | 1527 | - | LSC | 908  | 303 | 306 | CCC (P) => CTC<br>(L) |
| <i>ndhA</i> | 1089 | - | SSC | 431  | 144 | 144 | TCG (S) => TTG<br>(L) |
| <i>ndhA</i> | 1089 | - | SSC | 526  | 176 | 179 | CCT (P) => TCT<br>(S) |
| <i>ndhA</i> | 1089 | - | SSC | 647  | 216 | 219 | CCA (P) => CTA<br>(L) |
| <i>ndhA</i> | 1089 | - | SSC | 668  | 223 | 226 | TCC (S) => TTC<br>(F) |
| <i>ndhA</i> | 1089 | - | SSC | 751  | 251 | 255 | CAC (H) => TAC<br>(Y) |
| <i>ndhA</i> | 1089 | - | SSC | 812  | 271 | 275 | CCC (P) => CTC<br>(L) |
| <i>ndhA</i> | 1089 | - | SSC | 964  | 322 | 326 | CAC (H) => TAC<br>(Y) |
| <i>ndhA</i> | 1089 | - | SSC | 1031 | 344 | 348 | CCC (P) => CTC<br>(L) |
| <i>ndhB</i> | 1533 | + | IR  | 149  | 50  | 50  | TCA (S) => TTA<br>(L) |

|             |      |   |     |      |     |     |                       |
|-------------|------|---|-----|------|-----|-----|-----------------------|
| <i>ndhB</i> | 1533 | + | IR  | 467  | 156 | 156 | CCA (P) => CTA<br>(L) |
| <i>ndhB</i> | 1533 | + | IR  | 542  | 181 | 181 | ACG (T) => ATG<br>(M) |
| <i>ndhB</i> | 1533 | + | IR  | 586  | 196 | 196 | CAT (H) => TAT<br>(Y) |
| <i>ndhB</i> | 1533 | + | IR  | 611  | 204 | 204 | TCA (S) => TTA<br>(L) |
| <i>ndhB</i> | 1533 | + | IR  | 737  | 246 | 246 | CCA (P) => CTA<br>(L) |
| <i>ndhB</i> | 1533 | + | IR  | 746  | 249 | 249 | TCT (S) => TTT (F)    |
| <i>ndhB</i> | 1533 | + | IR  | 830  | 277 | 277 | TCA (S) => TTA<br>(L) |
| <i>ndhB</i> | 1533 | + | IR  | 836  | 279 | 279 | TCA (S) => TTA<br>(L) |
| <i>ndhB</i> | 1533 | + | IR  | 902  | 301 | 301 | ACC (T) => ATC<br>(I) |
| <i>ndhB</i> | 1533 | + | IR  | 1255 | 419 | 419 | CAT (H) => TAT<br>(Y) |
| <i>ndhB</i> | 1533 | + | IR  | 1481 | 494 | 494 | CCA (P) => CTA<br>(L) |
| <i>ndhD</i> | 1503 | - | SSC | 146  | 49  | 49  | ACA (T) => ATA<br>(I) |
| <i>ndhD</i> | 1503 | - | SSC | 668  | 223 | 224 | CCA (P) => CTA<br>(L) |

|             |      |   |     |      |     |     |                       |
|-------------|------|---|-----|------|-----|-----|-----------------------|
| <i>ndhD</i> | 1503 | - | SSC | 985  | 329 | 331 | CCC (P) => TCC<br>(S) |
| <i>ndhD</i> | 1503 | - | SSC | 1081 | 361 | 363 | CCA (P) => TCA<br>(S) |
| <i>ndhD</i> | 1503 | - | SSC | 1150 | 384 | 386 | CAT (H) => TAT<br>(Y) |
| <i>ndhD</i> | 1503 | - | SSC | 1343 | 448 | 453 | ACG (T) => ATG<br>(M) |
| <i>ndhD</i> | 1503 | - | SSC | 1414 | 472 | 481 | CTT (L) => TTT (F)    |
| <i>ndhF</i> | 2226 | - | SSC | 392  | 131 | 131 | TCC (S) => TTC<br>(F) |
| <i>ndhF</i> | 2226 | - | SSC | 586  | 196 | 196 | CTT (L) => TTT (F)    |
| <i>ndhF</i> | 2226 | - | SSC | 623  | 208 | 208 | TCA (S) => TTA<br>(L) |
| <i>ndhF</i> | 2226 | - | SSC | 1385 | 462 | 462 | TCT (S) => TTT (F)    |
| <i>ndhF</i> | 2226 | - | SSC | 1567 | 523 | 526 | CTT (L) => TTT (F)    |
| <i>ndhF</i> | 2226 | - | SSC | 1691 | 564 | 568 | ACT (T) => ATT (I)    |
| <i>ndhF</i> | 2226 | - | SSC | 1846 | 616 | 625 | CTT (L) => TTT (F)    |
| <i>ndhF</i> | 2226 | - | SSC | 2177 | 726 | 735 | TCA (S) => TTA<br>(L) |
| <i>ndhG</i> | 531  | - | SSC | 148  | 50  | 50  | CAT (H) => TAT<br>(Y) |
| <i>ndhG</i> | 531  | - | SSC | 155  | 52  | 52  | CCA (P) => CTA<br>(L) |

|              |      |   |     |     |     |     |                       |
|--------------|------|---|-----|-----|-----|-----|-----------------------|
| <i>ndhG</i>  | 531  | - | SSC | 166 | 56  | 56  | CAT (H) => TAT<br>(Y) |
| <i>ndhG</i>  | 531  | - | SSC | 314 | 105 | 105 | ACA (T) => ATA<br>(I) |
| <i>petB</i>  | 648  | + | LSC | 418 | 140 | 140 | CGG (R) => TGG<br>(W) |
| <i>petB</i>  | 648  | + | LSC | 611 | 204 | 204 | CCA (P) => CTA<br>(L) |
| <i>petL</i>  | 96   | + | LSC | 5   | 2   | 4   | CCT (P) => CTT<br>(L) |
| <i>psbE</i>  | 252  | - | LSC | 214 | 72  | 72  | CCT (P) => TCT<br>(S) |
| <i>psbF</i>  | 120  | - | LSC | 77  | 26  | 26  | TCT (S) => TTT (F)    |
| <i>rpl2</i>  | 825  | + | IR  | 2   | 1   | 1   | ACG (T) => ATG<br>(M) |
| <i>rpl20</i> | 354  | - | LSC | 235 | 79  | 79  | CAT (H) => TAT<br>(Y) |
| <i>rpl20</i> | 354  | - | LSC | 257 | 86  | 86  | TCG (S) => TTG<br>(L) |
| <i>rpl20</i> | 354  | - | LSC | 278 | 93  | 93  | CCC (P) => CTC<br>(L) |
| <i>rpoA</i>  | 1035 | - | LSC | 368 | 123 | 123 | TCA (S) => TTA<br>(L) |
| <i>rpoA</i>  | 1035 | - | LSC | 830 | 277 | 279 | TCA (S) => TTA<br>(L) |

|              |      |   |     |      |     |      |                                      |
|--------------|------|---|-----|------|-----|------|--------------------------------------|
| <i>rpoA</i>  | 1035 | - | LSC | 920  | 307 | 309  | ACG (T) => ATG<br>(M)                |
| <i>rpoB</i>  | 3213 | - | LSC | 473  | 158 | 159  | TCA (S) => TTA<br>(L)                |
| <i>rpoB</i>  | 3213 | - | LSC | 566  | 189 | 190  | TCG (S) => TTG<br>(L)                |
| <i>rpoB</i>  | 3213 | - | LSC | 623  | 208 | 209  | CCG (P) => CTG<br>(L)                |
| <i>rpoB</i>  | 3213 | - | LSC | 2426 | 809 | 827  | TCA (S) => TTA<br>(L)                |
| <i>rpoC1</i> | 2049 | - | LSC | 41   | 14  | 14   | TCA (S) => TTA<br>(L)                |
| <i>rpoC1</i> | 2049 | - | LSC | 1447 | 483 | 500  | CGT (R) => TGT<br>(C)                |
| <i>rpoC1</i> | 2049 | - | LSC | 1946 | 649 | 674  | ACT (T) => ATT (I)<br>ACG (T) => ATG |
| <i>rpoC2</i> | 4158 | - | LSC | 1493 | 498 | 517  | (M)                                  |
| <i>rpoC2</i> | 4158 | - | LSC | 1586 | 529 | 548  | TCT (S) => TTT (F)<br>CGT (R) => TGT |
| <i>rpoC2</i> | 4158 | - | LSC | 1774 | 592 | 613  | (C)                                  |
| <i>rpoC2</i> | 4158 | - | LSC | 2287 | 763 | 948  | CGG (R) => TGG<br>(W)                |
| <i>rpoC2</i> | 4158 | - | LSC | 2812 | 938 | 1131 | CCT (P) => TCT<br>(S)                |

|              |      |   |     |      |      |      |                       |
|--------------|------|---|-----|------|------|------|-----------------------|
| <i>rpoC2</i> | 4158 | - | LSC | 3722 | 1241 | 1453 | TCA (S) => TTA<br>(L) |
| <i>rps2</i>  | 711  | - | LSC | 233  | 78   | 83   | CCC (P) => CTC<br>(L) |
| <i>rps2</i>  | 711  | - | LSC | 310  | 104  | 109  | CGG (R) => TGG<br>(W) |
| <i>rps2</i>  | 711  | - | LSC | 443  | 148  | 153  | CCT (P) => CTT<br>(L) |
| <i>rps2</i>  | 711  | - | LSC | 631  | 211  | 218  | CCA (P) => TCA<br>(S) |
| <i>rps2</i>  | 711  | - | LSC | 644  | 215  | 222  | ACC (T) => ATC<br>(I) |
| <i>rps8</i>  | 399  | - | LSC | 182  | 61   | 61   | TCA (S) => TTA<br>(L) |
| <i>rps14</i> | 303  | - | LSC | 149  | 50   | 53   | CCA (P) => CTA<br>(L) |
| <i>rps16</i> | 267  | - | LSC | 143  | 48   | 48   | TCA (S) => TTA<br>(L) |
| <i>rps16</i> | 267  | - | LSC | 212  | 71   | 71   | TCA (S) => TTA<br>(L) |
| <i>ycf3</i>  | 507  | - | LSC | 44   | 15   | 15   | TCT (S) => TTT (F)    |
| <i>ycf3</i>  | 507  | - | LSC | 407  | 136  | 136  | TCC (S) => TTC<br>(F) |

---



Supplementary Table 10. The list of accession numbers of the chloroplast genome sequences was used in this study.

| No. | Taxon                                                    | Family          | GenBank    |
|-----|----------------------------------------------------------|-----------------|------------|
| 1   | <i>Macleaya microcarpa</i>                               | Papaveraceae    | MH394383.1 |
| 2   | <i>Coreanomecon hylomeconoides</i>                       | Papaveraceae    | KT274030.1 |
| 3   | <i>Papaver somniferum</i>                                | Papaveraceae    | KU204905.1 |
| 4   | <i>Papaver rhoeas</i>                                    | Papaveraceae    | MF943221.1 |
| 5   | <i>Papaver orientale</i>                                 | Papaveraceae    | MF943222.1 |
| 6   | <i>Meconopsis racemosa</i>                               | Papaveraceae    | MK533649   |
| 7   | <i>Meconopsis racemosa</i> (MH394401)                    | Papaveraceae    | MH394401   |
| 8   | <i>Meconopsis integrifolia</i> (Maxim.) Franch           | Papaveraceae    | MK533647   |
| 9   | <i>Meconopsis horridula</i>                              | Papaveraceae    | MK533646   |
| 10  | <i>Meconopsis punicea</i>                                | Papaveraceae    | MK533648   |
| 11  | <i>Decaisnea insignis</i>                                | Lardizabalaceae | KY200671.1 |
| 12  | <i>Euptelea pleiosperma</i>                              | Eupteleaceae    | KU204900.1 |
| 13  | <i>Berberis koreana</i>                                  | Berberidaceae   | KM057375.1 |
| 14  | <i>Berberis amurensis</i> var. <i>latifolia</i>          | Berberidaceae   | KM057377.1 |
| 15  | <i>Berberis amurensis</i>                                | Berberidaceae   | KM057374.1 |
| 16  | <i>Berberis amurensis</i> var. <i>quelpaertensis</i>     | Berberidaceae   | KM057376.1 |
| 17  | <i>Diphylleia sinensis</i>                               | Berberidaceae   | MG593057.1 |
| 18  | <i>Diphylleia cymosa</i>                                 | Berberidaceae   | MG593058.1 |
| 19  | <i>Diphylleia grayi</i>                                  | Berberidaceae   | MG593049.1 |
| 20  | <i>Sinopodophyllum hexandrum</i> voucher<br>SHEX20150512 | Berberidaceae   | KR779994.1 |
| 21  | <i>Sinopodophyllum hexandrum</i>                         | Berberidaceae   | MG593048.1 |

|    |                                                         |                |            |
|----|---------------------------------------------------------|----------------|------------|
| 22 | <i>Plagiorhegma dubium</i>                              | Berberidaceae  | MG397139.1 |
| 23 | <i>Gymnospermium microrrhynchum</i>                     | Berberidaceae  | KM057373.1 |
| 24 | <i>Nandina domestica</i>                                | Berberidaceae  | DQ923117.1 |
| 25 | <i>Stephania japonica</i>                               | Menispermaceae | KU204903.1 |
| 26 | <i>Clematis brevicaudata</i>                            | Ranunculaceae  | MG675223.1 |
| 27 | <i>Naravelia zeylanica</i>                              | Ranunculaceae  | MG675224.1 |
| 28 | <i>Clematis repens</i>                                  | Ranunculaceae  | MG675222.1 |
| 29 | <i>Clematis alternata</i>                               | Ranunculaceae  | MG675221.1 |
| 30 | <i>Anemone henryi</i>                                   | Ranunculaceae  | MG001340.1 |
| 31 | <i>Clematis fusca</i> var. <i>coreana</i> voucher PG003 | Ranunculaceae  | KM652489.1 |
| 32 | <i>Clematis terniflora</i>                              | Ranunculaceae  | KJ956785.1 |
| 33 | <i>Naravelia pilulifera</i>                             | Ranunculaceae  | KY120887.1 |
| 34 | <i>Coptis chinensis</i>                                 | Ranunculaceae  | KY120323.1 |
| 35 | <i>Coptis quinquesecta</i> isolate WLHL                 | Ranunculaceae  | MG585353.1 |
| 36 | <i>Clematis alternata</i> isolate Tamura 1              | Ranunculaceae  | MG573152.1 |
| 37 | <i>Trollius chinensis</i>                               | Ranunculaceae  | KX752098.1 |
| 38 | <i>Urophysa rockii</i>                                  | Ranunculaceae  | MH006686.2 |
| 39 | <i>Semiaquilegia adoxoides</i>                          | Ranunculaceae  | MH142265.2 |
| 40 | <i>Urophysa henryi</i>                                  | Ranunculaceae  | MH142266.2 |
| 41 | <i>Sabia yunnanensis</i>                                | Sabiaceae      | KU204902.1 |
| 42 | <i>Nelumbo nucifera</i>                                 | Nelumbonaceae  | KF009944.1 |

---



Supplementary Fig.2 Phylogenetic tree reconstruction of the 13 species inferred from maximum likelihood (ML), based on *ndhF* genes.

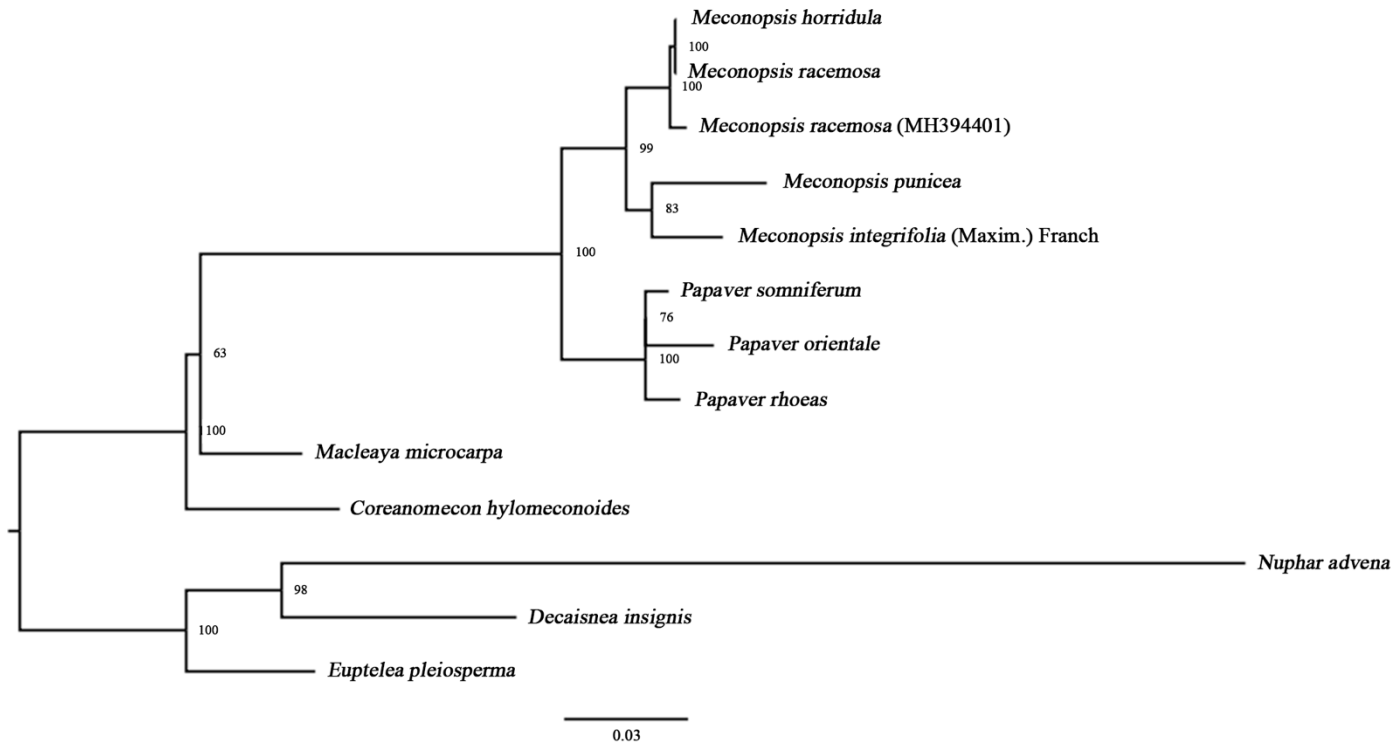

Supplementary Fig.3 Phylogenetic tree reconstruction of the 13 species inferred from maximum likelihood (ML), based on *petA* genes.

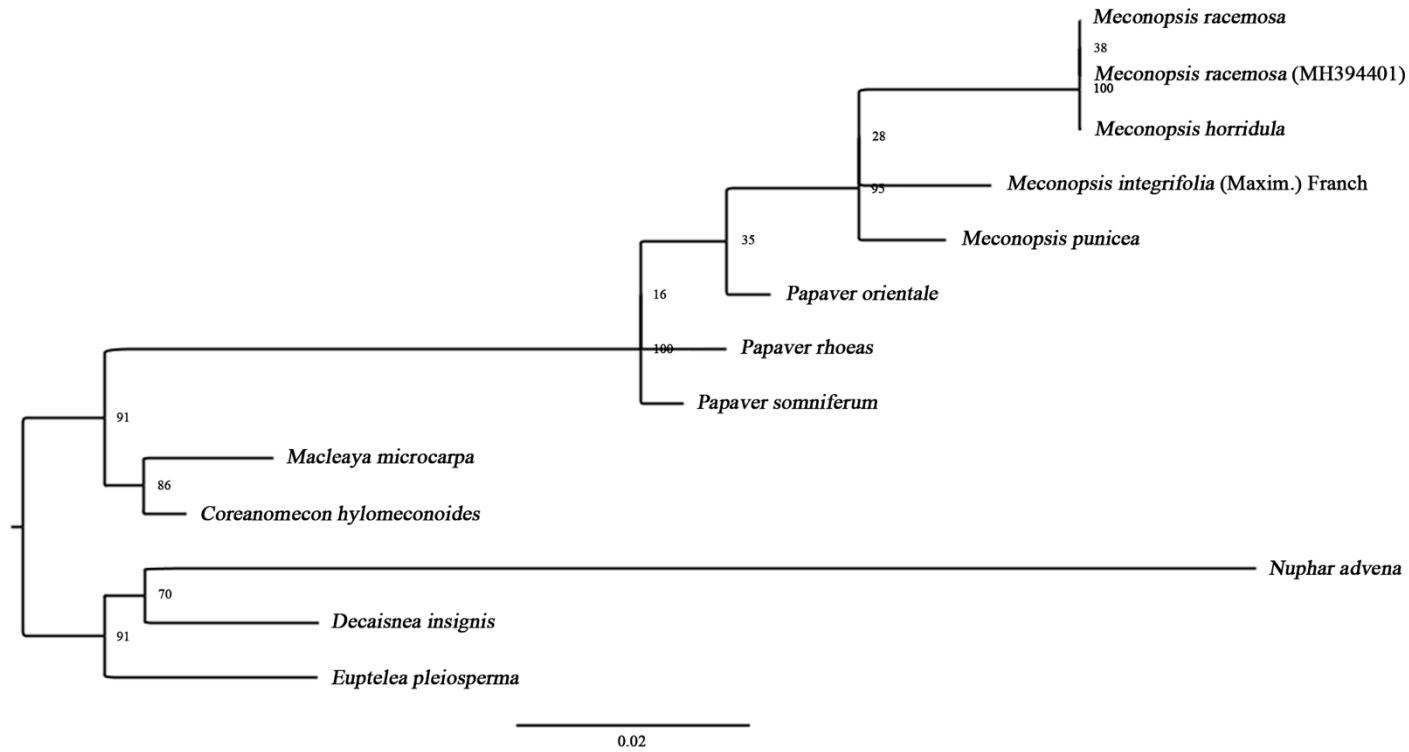

Supplementary Fig.4 Phylogenetic tree reconstruction of the 13 species inferred from maximum likelihood (ML), based on *rpoC2* genes.

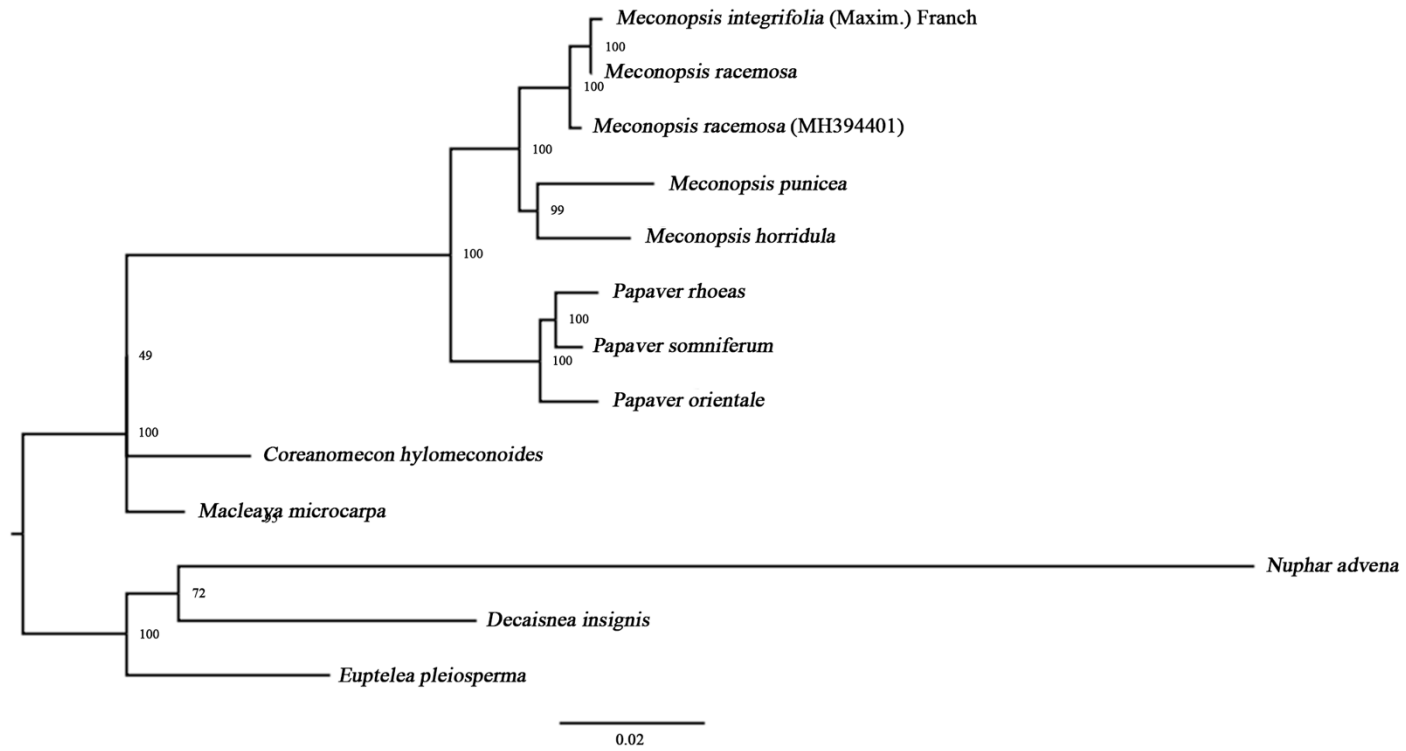

Supplement: 41598_2019_47008_MOESM1_ESM.pdf [file 41598_2019_47008_MOESM1_ESM.pdf]
